# Supplementary material for: Identification of ubiquitin-specific protease 32 as an oncogene in glioblastoma and the underlying mechanisms
Source: PubMed Central journal article supplement (PMC9018837; doi:10.1038/s41598-022-09497-y), 2022-04-19

Figure 2D

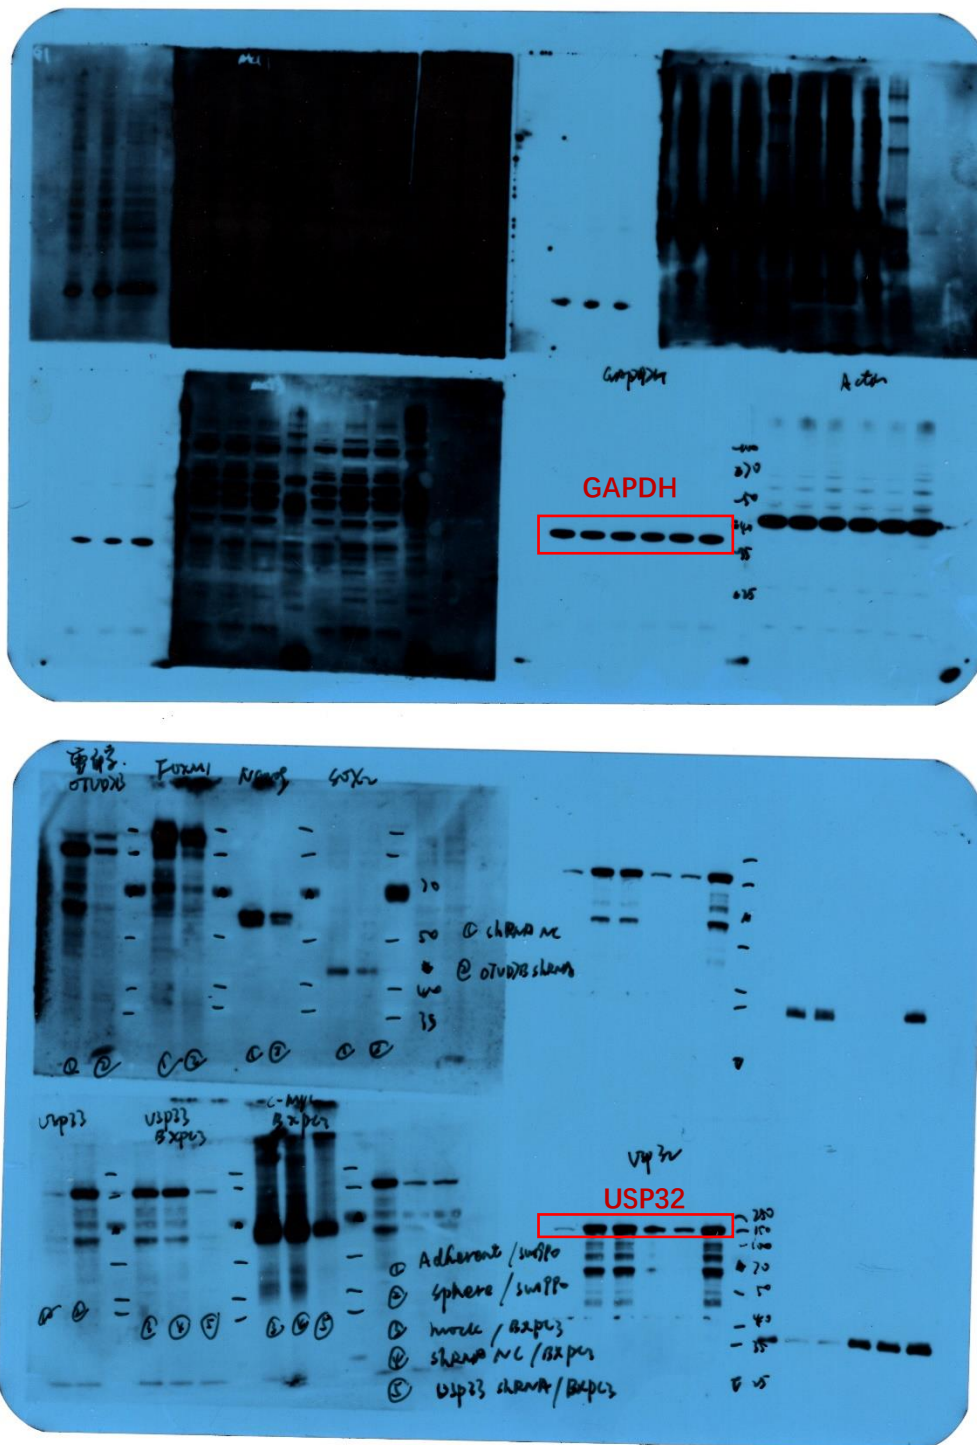

Figure 3B

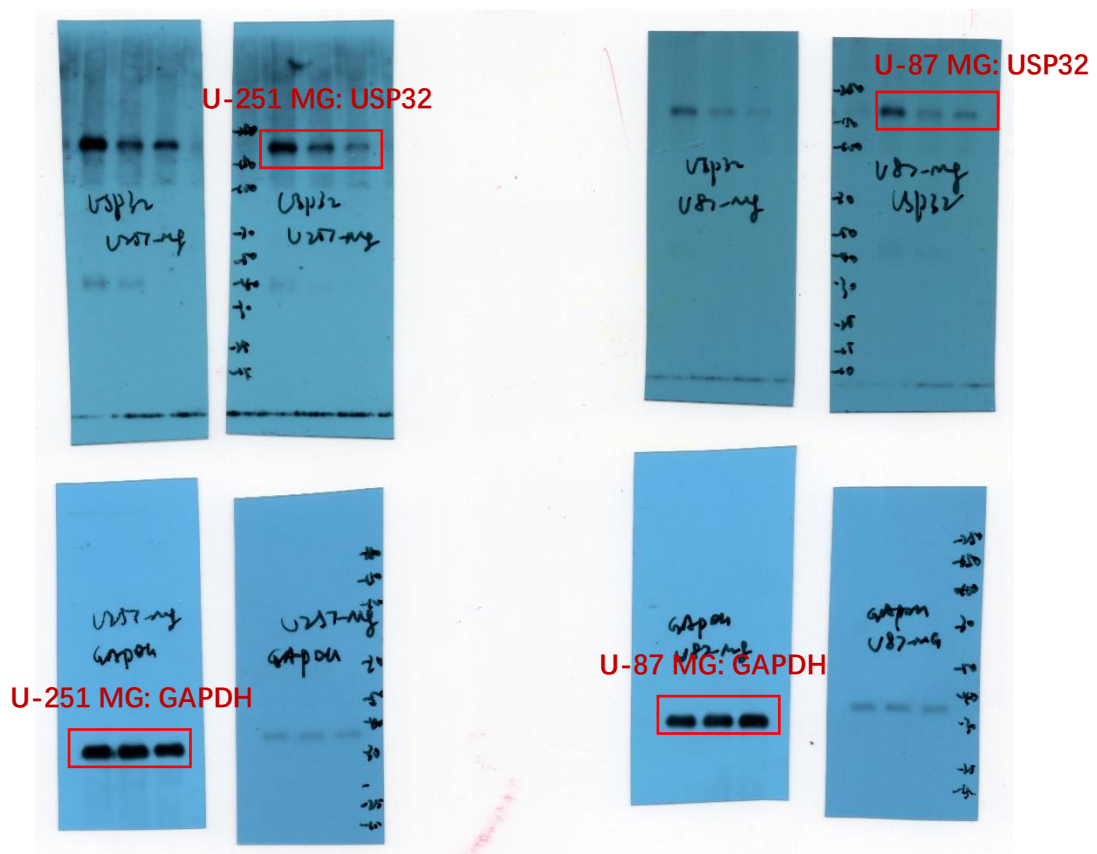

Figure 5H

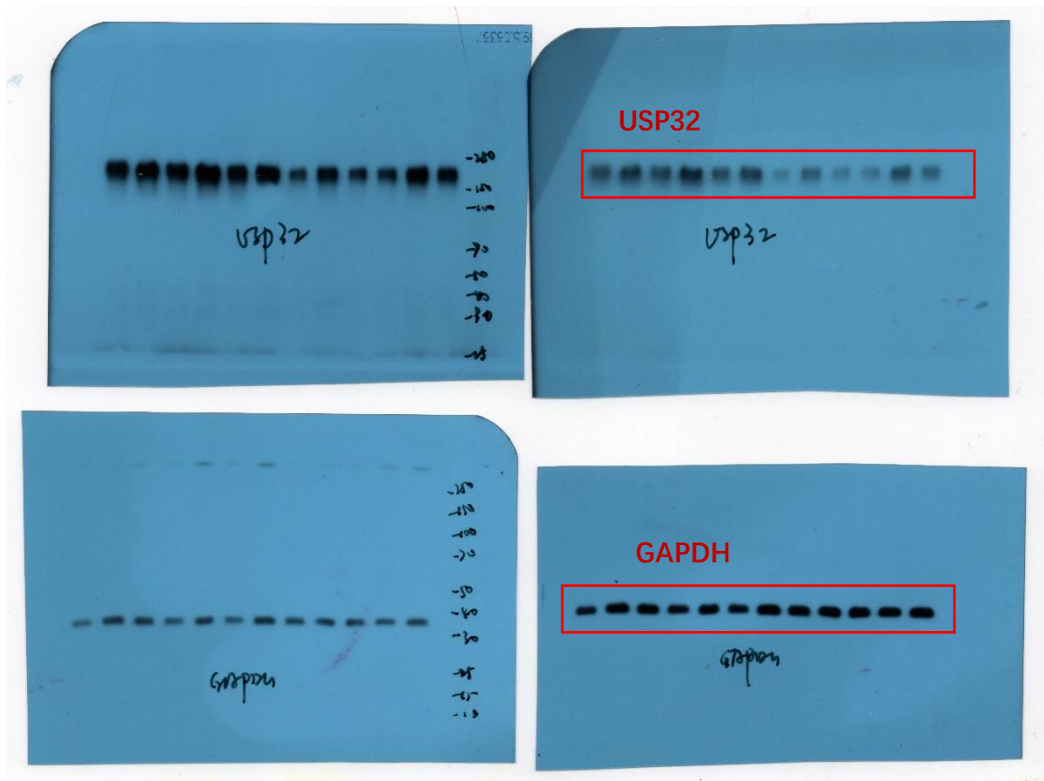

Supplement: 41598_2022_9497_MOESM1_ESM.pdf [file 41598_2022_9497_MOESM1_ESM.pdf]
