# Supplementary material for: Identification of ubiquitin-specific protease 32 as an oncogene in glioblastoma and the underlying mechanisms
Source: PubMed Central journal article supplement (PMC9018837; doi:10.1038/s41598-022-09497-y), 2022-04-19
Supplement: 41598_2022_9497_MOESM2_ESM.pdf [file 41598_2022_9497_MOESM2_ESM.pdf]

**Table S1.** Gene Ontology (GO) enrichment analysis

| Functional category                                          | Significant DEGs                                                                                                                                                                                                                                                                                                                                                                                                                                                                                                                                                                                                                                                                                                                                                    |
|--------------------------------------------------------------|---------------------------------------------------------------------------------------------------------------------------------------------------------------------------------------------------------------------------------------------------------------------------------------------------------------------------------------------------------------------------------------------------------------------------------------------------------------------------------------------------------------------------------------------------------------------------------------------------------------------------------------------------------------------------------------------------------------------------------------------------------------------|
| DNA replication<br>(GO:0006260)                              | RRM2,MCM4,EREG,FEN1,MCM3,GINS2,CDC6,ORC6,RRM1,ORC1,GMNN,CDC45,DTL,MCM10,E2F8,GINS1,PCLAF,TIMELESS,PCNA,MCM6,CDC25A,RFC3,EXO1,PDGFA,CLSPN,NFIX,CDC7,NFIC,GINS4,CHAF1B,MCM7,BCL6,ESCO2,POLA2,GINS3,<br>RFC4,MCM2,TICRR,HMGA1,POLE,TGFB1,DSCC1,CDK1,PTMS,RFWD3,CDK2,CHAF1A,POLD4,NASP,SLBP,MC<br>M8,MCM5,<br>DONSON,MCMBP,DNA2,BRCA1,RFC2,CCNE2,BARD1,NUCKS1,SMC1A,KCTD13,TOP1MT,PPP2CA,MUS81,RFC<br>5,BRIP1,ORC5,<br>TOPBP1,WDHD1,WDR18,UCN,FGFR1,MMS22L,LIG1,PARP1,POLE3,RBBP4,ID3,CACYBP,NBN,CDC34,POLL,RP<br>A1,CTC1,<br>ORC3,KAT5,POLE2,RMI1,CST3,S100A11,WIZ,DBF4,POLA1,BLM,RPA2,RMI2,CDK9,CALR,GLI1,TONSL,FAM11<br>1A,<br>CDC25C,TIPIN,RBBP8,RAD1,PARP3,PRIM2,TOP1,POLQ,POLD3,HELB,HUS1,PURA,ING4,PNKP,CHEK1,POLD1,<br>USP37,POLG,IGF1R,DACH1,ATRIP,INSR,RECQL4 |
| negative regulation of cell<br>cycle process<br>(GO:0010948) | RRM2,LIF,MLXIPL,DTL,E2F8,PCNA,FBXO5,TRIP13,GADD45A,CLSPN,CDC7,KLF4,PSMC2,TFDP1,BRSK1,PCGF<br>2,BCL6,<br>DUSP1,FANCI,TICRR,AURKA,CCNB1,PSMD14,EZH2,CDK1,RFWD3,PLK3,PSMD12,PLK2,CDK2,NOP53,PSMD2,<br>NDC80,<br>DACT1,E2F1,TNKS1BP1,MAD2L1,CASP2,RBL1,DONSON,FOXO4,PSMB10,BRCA1,PSMD1,SMC1A,PSMA4,MSH<br>2,PSMD11,<br>GEN1,ZNF207,ZNF385A,GTSE1,CNOT9,MUS81,MTBP,CDKN1A,TOPBP1,UBA52,PIDD1,PSMD6,SKP1,RB1,CNO<br>T6,PML,<br>CTDSP1,RBBP4,BUB1B,PSMA1,MIIP,PSME4,BUB3,RINT1,NBN,HMGA2,PSMD7,DAB2IP,TP53,ARID3A,CTDSPL<br>,RBX1,<br>PSMA3,PSMD5,PRKDC,CARM1,AURKAIP1,PCBP4,PSMB1,BLM,ZFP36L1,RPA2,TP63,CDK9,GPNMB,CALR,TRI                                                                                                                                               |

AP1,H2AFY,  
CDC25C,BUB1,RBBP8,TFAP4,CHMP2A,RAD1,MDM1,FBXO43,PLK1,CDC14B,GPER1,BMI1,PSME3,ABRAXAS1,  
BAX,VPS4A,  
HSP90AB1,PPP2R5B,PSMC5,EPC1,HUS1,PSMA2,CTDSP2,TTK,NEK2,CNOT7,PSMD10,CHEK1,CNOT10,PTTG1,F  
ZR1,CNOT8,PHC1,HMGN5,CDKN2D,TMEM67,PRMT1,PSMA5,PSMC6,NAE1

negative regulation of cell  
cycle phase transition  
(GO:1901988)

DTL,E2F8,PCNA,TRIP13,GADD45A,CLSPN,KLF4,PSMC2,TFDP1,BRSK1,DUSP1,FANCI,TICRR,AURKA,CCNB1,  
PSMD14,  
EZH2,CDK1,RFWD3,PLK3,PSMD12,PLK2,CDK2,NOP53,PSMD2,NDC80,DACT1,E2F1,TKNS1BP1,MAD2L1,CASP  
2,RBL1,  
DONSON,FOXO4,PSMB10,BRCA1,PSMD1,PSMA4,PSMD11,GEN1,ZNF207,ZNF385A,GTSE1,CNOT9,MUS81,CDK  
N1A,TOPBP1,  
UBA52,PIDD1,PSMD6,SKP1,RB1,CNOT6,PML,CTDSP1,BUB1B,PSMA1,MIIP,PSME4,BUB3,RINT1,NBN,HMGA2,  
PSMD7,  
TP53,ARID3A,CTDSPL,RBX1,PSMA3,PSMD5,PRKDC,CARM1,PCBP4,PSMB1,BLM,ZFP36L1,RPA2,TP63,GPNMB  
,TRIAP1,  
H2AFY,CDC25C,BUB1,PLK1,CDC14B,PSME3,ABRAXAS1,BAX,VPS4A,PSMC5,HUS1,PSMA2,CTDSP2,TTK,CNO  
T7,PSMD10,CHEK1,CNOT10,FZR1,CNOT8,CDKN2D,PRMT1,PSMA5,PSMC6,NAE1

regulation of cell cycle phase  
transition  
(GO:1901987)

ID2,CDC6,TCIM,PKD1,CDC45,DTL,E2F8,PCNA,CDC25A,TRIP13,CEP78,GADD45A,CLSPN,CDC7,KLF4,PSMC2,T  
FDP1,  
PRKAR2B,BRSK1,DUSP1,HSP90AA1,FANCI,TICRR,TGFB1,AURKA,CCNB1,PSMD14,EZH2,CDK1,FAM83D,RF  
WD3,PLK3,  
PSMD12,PLK2,CDK2,NOP53,PSMD2,NDC80,DACT1,PKIA,TPX2,CDC23,PLK4,E2F1,TNKS1BP1,MAD2L1,CASP2,  
RBL1,  
DONSON,FOXO4,CSNK1E,PSMB10,BRCA1,PSMD1,PSMA4,SMARCD3,CDCA5,PSMD11,ATAD5,GEN1,CEP76,Z  
NF207,ZNF385A,GTSE1,CNOT9,MUS81,MTBP,CDKN1A,TOPBP1,KNTC1,UBA52,PIDD1,ERCC2,PSMD6,SKP1,R  
B1,BID,CNOT6,UBE2C,PML,  
CTDSP1,BUB1B,PSMA1,MIIP,PSME4,BUB3,YWHAG,RINT1,XPC,NBN,ATP2B4,TUBA4A,HMGA2,CTC1,PSMD7,  
DLGAP5,TP53,ARID3A,CTDSPL,RBX1,PSMA3,PSMD5,PRKDC,CARM1,TMOD3,RAD51C,PCBP4,PSMB1,TUBA1  
A,HMMR,BLM,NEDD1,ZFP36L1,ECD,RPA2,TP63,GPNMB,TRIAP1,GLI1,RDX,MAPRE1,H2AFY,CDC25C,BUB1,P  
AXIP1,TFAP4,UBE2E2,ANAPC5,HAUS8,  
DDRGK1,CENPE,HECW2,PLK1,CDC14B,FGFR1OP,PSME3,ABRAXAS1,BAX,VPS4A,PSMC5,HUS1,PSMA2,PPP1  
R9B,STXBP4,  
CEP250,CTDSP2,TTK,NEK2,CNOT7,PSMD10,CHEK1,HAUS1,CNOT10,CDK6,ANXA1,CEP192,FZR1,CNOT8,DYN  
C112,CDKN2D,PRMT1,PSMA5,PSMC6,DYNLL1,NAE1

negative regulation of mitotic  
cell cycle  
(GO:0045930)

E2F8,PCNA,ZWILCH,TRIP13,GADD45A,BCL2L1,CLSPN,FOXC1,KLF4,PSMC2,TFDP1,BRSK1,BCL6,DUSP1,FANCI,TICRR,  
TGFB1,AURKA,CCNB1,PSMD14,EZH2,CDK1,RFWD3,PLK3,PSMD12,BTG1,PLK2,CDK2,NOP53,PSMD2,NDC80,  
DACT1,E2F1,  
TNKS1BP1,MAD2L1,CASP2,RBL1,DONSON,FOXO4,PSMB10,BRCA1,PSMD1,PSMA4,MSH2,PSMD11,GEN1,ZNF207,ZNF385A,  
GTSE1,CNOT9,MUS81,MTBP,CDKN1A,TOPBP1,KNTC1,UBA52,PIDD1,PSMD6,SKP1,RB1,CNOT6,PML,CTDSP1,  
ZWINT,  
BUB1B,PSMA1,MIIP,PSME4,BUB3,NLE1,RINT1,XPC,NBN,HMGA2,PSMD7,TP53,ARID3A,CTDSPL,RBX1,PSMA3,PSMD5,  
PRKDC,CARM1,ABL1,AURKAIP1,PCBP4,PSMB1,BLM,CTNNB1,ZFP36L1,BTG3,RPA2,TP63,GPNMB,TRIAP1,CD  
C25C,TIPIN,BUB1,ATF2,PLK1,CDC14B,PSME3,BAX,VPS4A,PSMC5,HUS1,PSMA2,CTDSP2,TTK,PNPT1,CNOT7,  
PSMD10,PRCC,CHEK1,CNOT10,PTTG1,CNOT8,PTPN3,NABP1,PRMT1,PSMA5,PSMC6,NAE1

negative regulation of mitotic  
cell cycle phase transition  
(GO:1901991)

E2F8,PCNA,TRIP13,GADD45A,CLSPN,KLF4,PSMC2,TFDP1,BRSK1,DUSP1,FANCI,TICRR,AURKA,CCNB1,PSMD14,EZH2,  
CDK1,RFWD3,PLK3,PSMD12,PLK2,CDK2,NOP53,PSMD2,NDC80,DACT1,E2F1,TNKS1BP1,MAD2L1,CASP2,RBL1,DONSON,  
FOXO4,PSMB10,BRCA1,PSMD1,PSMA4,PSMD11,GEN1,ZNF207,ZNF385A,GTSE1,CNOT9,MUS81,CDKN1A,TOPBP1,UBA52,  
PIDD1,PSMD6,SKP1,RB1,CNOT6,PML,CTDSP1,BUB1B,PSMA1,MIIP,PSME4,BUB3,RINT1,NBN,HMGA2,PSMD7,TP53,  
ARID3A,CTDSPL,RBX1,PSMA3,PSMD5,PRKDC,CARM1,PCBP4,PSMB1,BLM,ZFP36L1,RPA2,TP63,GPNMB,TRIAP1,CDC25C,  
BUB1,PLK1,PSME3,BAX,VPS4A,PSMC5,HUS1,PSMA2,CTDSP2,TTK,CNOT7,PSMD10,CNOT10,CNOT8,PRMT1,PSMA5,PSMC6,NAE1

DNA-dependent DNA replication  
(GO:0006261)

MCM4,FEN1,MCM3,GINS2,CDC6,ORC6,ORC1,GMNN,CDC45,MCM10,E2F8,GINS1,TIMELESS,PCNA,MCM6,RF C3,CDC7,  
GINS4,MCM7,BCL6,POLA2,GINS3,RFC4,MCM2,TICRR,HMGA1,POLE,DSCC1,RFWD3,CDK2,POLD4,SLBP,MC M8,MCM5,  
DONSON,MCMBP,DNA2,RFC2,CCNE2,NUCKS1,SMC1A,MUS81,RFC5,ORC5,TOPBP1,WDHD1,WDR18,FGFR1, MMS22L,LIG1,  
PARP1,POLE3,NBN,CDC34,RPA1,ORC3,POLE2,WIZ,POLA1,BLM,RPA2,CDK9,TONSL,TIPIN,PARP3,PRIM2,POL Q,POLD3, HELB,PURA,PNKP,POLD1,POLG,DACH1

DNA replication initiation(GO:0006270)

MCM4,MCM3,GINS2,CDC6,ORC6,ORC1,CDC45,MCM10,MCM6,CDC7,GINS4,MCM7,POLA2,MCM2,TICRR,POL E,CDK2,MCM8, MCM5,CCNE2,ORC5,TOPBP1,WDR18,POLE3,NBN,CDC34,ORC3,POLE2,POLA1,PRIM2,PURA ID2,CDC6,PKD1,CDC45,DTL,E2F8,PCNA,TRIP13,CEP78,GADD45A,CLSPN,CDC7,KLF4,PSMC2,TFDP1,PRKAR2 B,BRSK1,  
DUSP1,HSP90AA1,FANCI,TICRR,TGFB1,AURKA,CCNB1,PSMD14,EZH2,CDK1,RFWD3,PLK3,PSMD12,PLK2,CD K2,NOP53,  
PSMD2,NDC80,DACT1,PKIA,TPX2,CDC23,PLK4,E2F1,TNKS1BP1,MAD2L1,CASP2,RBL1,DONSON,FOXO4,CSN K1E,PSMB10,BRCA1,PSMD1,PSMA4,SMARCD3,CDCA5,PSMD11,ATAD5,GEN1,CEP76,ZNF207,ZNF385A,GTSE 1,CNOT9,MUS81,MTBP,  
CDKN1A,TOPBP1,KNTC1,UBA52,PIDD1,ERCC2,PSMD6,SKP1,RB1,BID,CNOT6,UBE2C,PML,CTDSP1,BUB1B,PS MA1,MIIP,  
PSME4,BUB3,YWHAG,RINT1,XPC,NBN,TUBA4A,HMGA2,CTC1,PSMD7,DLGAP5,TP53,ARID3A,CTDSPL,RBX1, PSMA3,PSMD5,PRKDC,CARM1,TMOD3,RAD51C,PCBP4,PSMB1,TUBA1A,HMMR,BLM,NEDD1,ZFP36L1,ECD,R PA2,TP63,GPNMB,TRIAP1,RDX,MAPRE1,CDC25C,BUB1,TFAP4,UBE2E2,ANAPC5,HAUS8,CENPE,HECW2,PLK 1,CDC14B,FGFR1OP,PSME3,BAX,VPS4A,  
PSMC5,HUS1,PSMA2,PPP1R9B,CEP250,CTDSP2,TTK,NEK2,CNOT7,PSMD10,HAUS1,CNOT10,CDK6,ANXA1,CE P192,CNOT8,DYNC1I2,CDKN2D,PRMT1,PSMA5,PSMC6,DYNLL1,NAE1

regulation of mitotic cell cycle phase transition  
(GO:1901990)

cell cycle checkpoint  
(GO:0000075)

WDR76,CDC6,CDC45,DTL,E2F8,TIMELESS,PCNA,ZWILCH,TRIP13,GADD45A,BCL2L1,CLSPN,TFDP1,BRSK1,D  
USP1,  
FANCI,TICRR,TGFB1,AURKA,CCNB1,CDK1,RFWD3,PLK3,PLK2,CDK2,NOP53,NDC80,E2F1,TNKS1BP1,MAD2L  
1,CASP2,  
DONSON,FOXO4,INTS7,DNA2,BRCA1,MSH2,GEN1,ZNF207,ZNF385A,GTSE1,CNOT9,MUS81,CDKN1A,BRIP1,T  
OPBP1,  
KNTC1,UBA52,PIDD1,RB1,CNOT6,SPDL1,PML,ZWINT,BUB1B,BUB3,RINT1,XPC,NBN,HMGA2,TP53,ARID3A,H  
2AFX,  
PRKDC,CARM1,PCBP4,BLM,RPA2,TP63,TRIAP1,CDC25C,TIPIN,BUB1,RBBP8,ATF2,RAD1,PLK1,CDC14B,ABR  
AXAS1,  
BAX,VPS4A,HUS1,FBXO4,TTK,CNOT7,PRCC,CHEK1,CNOT10,FZR1,CNOT8,DCLRE1B,ATRIP,TIPRL,NABP1,D  
DX39B, PRMT1,NAE1

mitotic cell cycle checkpoint  
(GO:0007093)

E2F8,PCNA,ZWILCH,TRIP13,GADD45A,BCL2L1,CLSPN,TFDP1,BRSK1,DUSP1,FANCI,TICRR,TGFB1,AURKA,C  
CNB1,CDK1,RFWD3,PLK3,PLK2,CDK2,NOP53,NDC80,E2F1,TNKS1BP1,MAD2L1,CASP2,DONSON,FOXO4,BRC  
A1,MSH2,GEN1,ZNF207,  
ZNF385A,GTSE1,CNOT9,MUS81,CDKN1A,TOPBP1,KNTC1,UBA52,PIDD1,RB1,CNOT6,PML,ZWINT,BUB1B,BU  
B3,RINT1,  
XPC,NBN,HMGA2,TP53,ARID3A,PRKDC,CARM1,PCBP4,BLM,RPA2,TP63,TRIAP1,CDC25C,TIPIN,BUB1,ATF2,P  
LK1,BAX, VPS4A,HUS1,TTK,CNOT7,PRCC,CNOT10,CNOT8,NABP1,PRMT1,NAE1

cell cycle G1/S phase transition  
(GO:0044843)

RRM2,MCM4,ID2,MYC,MCM3,CDC6,ORC6,ORC1,EIF4EBP1,TCIM,SKP2,PKD1,CDC45,MCM10,E2F8,PCNA,MCM6,DHFR,  
FBXO5,CDC25A,GADD45A,CCNA2,CDC7,KLF4,TFDP1,TYMS,MCM7,POLA2,MCM2,POLE,AURKA,CCNB1,EZH2,CDK1,FAM83D,RFWD3,PLK3,PLK2,CDK2,NASP,DACT1,MCM8,E2F1,TNKS1BP1,MCM5,CASP2,RBL1,CCNE2,ZNF385A,GTSE1,CNOT9,MTBP,CDKN1A,ORC5,WEE1,UBA52,PIDD1,RB1,BID,CNOT6,PML,POLE3,CTDSP1,CDKN3,ACVR1B,ATP2B4,CDC34,RPA1,ORC3,  
TP53,ARID3A,POLE2,CTDSPL,PRKDC,CARM1,PCBP4,ACVR1,RANBP1,DBF4,POLA1,ECD,RCC1,RPA2,TP63,GPNMB,  
CACUL1,TRIAP1,GLI1,RDX,CDC25C,TAF10,RBBP8,PPAT,UBE2E2,DDRGK1,PRIM2,PSME3,BAX,EIF4E,STXBP4,CTDSP2,CNOT7,CNOT10,CDK6,ANXA1,CNOT8,USP37,CDKN2D,PRMT1

nuclear DNA replication(GO:0033260)

FEN1,GINS2,GMNN,CDC45,GINS1,PCNA,RFC3,CDC7,BCL6,POLA2,RFC4,POLE,POLD4,SLBP,DONSON,DNA2,RFC2,RFC5,

G1/S transition of mitotic cell cycle  
(GO:0000082)

WDR18,FGFR1,LIG1,POLE3,RPA1,ORC3,POLE2,WIZ,POLA1,RPA2,TIPIN,PRIM2,POLD3,POLD1,DACH1  
RRM2,MCM4,ID2,MYC,MCM3,CDC6,ORC6,ORC1,EIF4EBP1,SKP2,PKD1,CDC45,MCM10,E2F8,PCNA,MCM6,DHFR,FBXO5,  
CDC25A,GADD45A,CDC7,KLF4,TFDP1,TYMS,MCM7,POLA2,MCM2,POLE,AURKA,CCNB1,EZH2,CDK1,RFWD3,PLK3,PLK2,  
CDK2,NASP,DACT1,MCM8,E2F1,TNKS1BP1,MCM5,CASP2,RBL1,CCNE2,ZNF385A,GTSE1,CNOT9,MTBP,CDKN1A,ORC5,  
WEE1,UBA52,PIDD1,RB1,BID,CNOT6,PML,POLE3,CTDSP1,CDKN3,ACVR1B,CDC34,RPA1,ORC3,TP53,ARID3A,POLE2,  
CTDSPL,PRKDC,CARM1,PCBP4,ACVR1,RANBP1,DBF4,POLA1,ECD,RCC1,RPA2,TP63,GPNMB,CACUL1,TRIAP1,RDX,  
CDC25C,TAF10,RBBP8,PPAT,UBE2E2,PRIM2,PSME3,BAX,EIF4E,CTDSP2,CNOT7,CNOT10,CDK6,ANXA1,CNOT8,USP37,CDKN2D,PRMT1

DNA biosynthetic process  
(GO:0071897)

MYC,DTL,PCLAF,CTGF,PCNA,GREM1,RFC3,XRCC2,EXO1,KLF4,TYMS,DUSP1,POLA2,RFC4,HSP90AA1,RAD51AP1,POLE,TK1,DSCC1,UFD1,POLD4,TNKS1BP1,PKIB,VCP,MAPK3,DNA2,BRCA1,RFC2,BARD1,XRCC5,SRC,NHP2,NEK7,RFC5,CDKN1A,BRIP1,UBA52,CCT2,CCT5,LIG1,PDGFRB,POLE3,PRKD2,SPRTN,MAP2K7,ARRB2,NBN,POLL,TCP1,RPA1,CCT8,CTC1,FAAP20,TP53,KAT5,POLE2,RMI1,RAD51C,POLA1,BLM,CTNNB1,RPA2,RMI2,RBBP8,CCT6A,PRIM2,UBE2L6,POLQ,SMG6,HSP90AB1,NOP10,POLD3,PNKP,FBXO4,NEK2,SMG5,POLM,POLD1,TENT4B,TRIM25,HNRNPA2B1,POLG,CDKN2D,DACH1,DDX39B

DNA integrity checkpoint  
(GO:0031570)

WDR76,CDC6,CDC45,DTL,E2F8,TIMELESS,PCNA,GADD45A,CLSPN,TFDP1,BRSK1,FANCI,TICRR,AURKA,CCNB1,CDK1,RFWD3,PLK3,PLK2,CDK2,NOP53,E2F1,TNKS1BP1,CASP2,DONSON,FOXO4,INTS7,DNA2,BRCA1,MSH2,ZNF385A,GTSE1,CNOT9,MUS81,CDKN1A,BRIP1,TOPBP1,UBA52,PIDD1,CNOT6,PML,RINT1,XPC,NBN,HMGA2,TP53,ARID3A,H2AFX,PRKDC,CARM1,PCBP4,BLM,RPA2,TP63,TRIAP1,CDC25C,TIPIN,RBBP8,ATF2,RAD1,PLK1,CDC14B,ABRAXAS1,BAX,HUS1,FBXO4,CNOT7,CHEK1,CNOT10,FZR1,CNOT8,ATRIP,TIPRL,DDX39B,PRMT1,NAE1

sister chromatid segregation  
(GO:0000819)

FEN1,CDC6,CENPK,SKA2,CENPI,ZWILCH,SKA1,TRIP13,CENPU,DSN1,SPC25,DYNC1I1,NCAPG,NCAPH,DUSP1,CENPO,RACGAP1,CCNB1,DSCC1,CHMP1B,ERCC6L,NCAPD3,KIF4A,CENPN,CENPM,NDC80,CDC23,MAD2L1,MCMBP,SPAG5,NUF2,SMC1A,CDCA5,KIF23,GEN1,PPP1CC,ZNF207,SLF1,KNTC1,SGO1,KIF2C,RB1,NUP85,UBE2C,SPDL1,TACC3,ZWINT,NUP107,BUB1B,KNL1,BUB3,CDCA8,CENPQ,NSL1,KPNB1,DLGAP5,NUP43,CENPL,CENPP,CHTF8,AKAP8L,RAD51C,SMC2,SMC4,CTNNB1,AURKC,CEP57L1,RAN,RMI2,SFPQ,CENPH,NUMA1,MAPRE1,H2AFY,BUB1,KNSTRN,CHMP2A,



ANAPC5,SPC24,  
CENPE,KIF22,HECW2,PLK1,CDC14B,NCAPD2,XPO1,VPS4A,PHF23,KIFC1,TTK,NEK2,NUP160,CTCF,MIS12,PTT  
G1, DYNC1I2,KIF18B,DYNLL1

mitotic DNA damage  
checkpoint  
(GO:0044773)

E2F8,PCNA,GADD45A,CLSPN,TFDP1,BRSK1,FANCI,AURKA,CCNB1,CDK1,RFWD3,PLK3,PLK2,CDK2,NOP53,E  
2F1,  
TNKS1BP1,CASP2,DONSON,FOXO4,MSH2,ZNF385A,GTSE1,CNOT9,MUS81,CDKN1A,TOPBP1,UBA52,PIDD1,C  
NOT6,PML,  
RINT1,XPC,NBN,HMGA2,TP53,ARID3A,PRKDC,CARM1,PCBP4,BLM,RPA2,TP63,TRIAP1,CDC25C,TIPIN,ATF2,  
BAX,HUS1,CNOT7,CNOT10,CNOT8,PRMT1

mitotic DNA integrity  
checkpoint  
(GO:0044774)

E2F8,PCNA,GADD45A,CLSPN,TFDP1,BRSK1,FANCI,TICRR,AURKA,CCNB1,CDK1,RFWD3,PLK3,PLK2,CDK2,N  
OP53,E2F1,  
TNKS1BP1,CASP2,DONSON,FOXO4,MSH2,ZNF385A,GTSE1,CNOT9,MUS81,CDKN1A,TOPBP1,UBA52,PIDD1,C  
NOT6,PML,  
RINT1,XPC,NBN,HMGA2,TP53,ARID3A,PRKDC,CARM1,PCBP4,BLM,RPA2,TP63,TRIAP1,CDC25C,TIPIN,ATF2,  
BAX,HUS1,CNOT7,CNOT10,CNOT8,PRMT1,NAE1

cell cycle DNA  
replication(GO:0044786)

FEN1,GINS2,GMNN,CDC45,E2F8,GINS1,PCNA,RFC3,CDC7,BCL6,POLA2,RFC4,POLE,POLD4,SLBP,DONSON,D  
NA2,RFC2,  
SMC1A,RFC5,WDR18,FGFR1,LIG1,POLE3,RPA1,ORC3,POLE2,WIZ,POLA1,RPA2,TIPIN,PRIM2,POLD3,POLD1,D  
ACH1

|                                                                             |                                                                                                                                                                                                                                                                                                                       |
|-----------------------------------------------------------------------------|-----------------------------------------------------------------------------------------------------------------------------------------------------------------------------------------------------------------------------------------------------------------------------------------------------------------------|
| <p>negative regulation of cell cycle G2/M phase transition (GO:1902750)</p> | <p>DTL,CLSPN,PSMC2,BRSK1,FANCI,TICRR,AURKA,PSMD14,CDK1,PSMD12,NOP53,PSMD2,DONSON,FOXO4,PSMB10,BRCA1,PSMD1,PSMA4,PSMD11,MUS81,TOPBP1,UBA52,PSMD6,SKP1,PSMA1,MIIP,PSME4,RINT1,NBN,HMGA2,PSMD7,RBX1,PSMA3,PSMD5,PSMB1,BLM,H2AFY,PLK1,CDC14B,PSME3,ABRAXAS1,VPS4A,PSMC5,HUS1,PSMA2,PSMD10,CHEK1,FZR1,PSMA5,PSMC6,NAE1</p> |
| <p>signal transduction involved in cell cycle checkpoint(GO:0072395)</p>    | <p>DTL,E2F8,PCNA,GADD45A,TFDP1,AURKA,CCNB1,CDK1,PLK3,PLK2,CDK2,E2F1,TNKS1BP1,CASP2,BRCA1,ZNF385A,GTSE1,CNOT9,CDKN1A,UBA52,PIDD1,CNOT6,PML,RINT1,TP53,ARID3A,PRKDC,CARM1,PCBP4,TRIAP1,CDC25C,PLK1,CDC14B,ABRAXAS1,BAX,CNOT7,CHEK1,CNOT10,FZR1,CNOT8,PRMT1</p>                                                          |
| <p>signal transduction involved in DNA integrity checkpoint(GO:0072401)</p> | <p>DTL,E2F8,PCNA,GADD45A,TFDP1,AURKA,CCNB1,CDK1,PLK3,PLK2,CDK2,E2F1,TNKS1BP1,CASP2,BRCA1,ZNF385A,GTSE1,CNOT9,CDKN1A,UBA52,PIDD1,CNOT6,PML,RINT1,TP53,ARID3A,PRKDC,CARM1,PCBP4,TRIAP1,CDC25C,PLK1,CDC14B,ABRAXAS1,BAX,CNOT7,CHEK1,CNOT10,FZR1,CNOT8,PRMT1</p>                                                          |
| <p>signal transduction involved in DNA damage checkpoint(GO:0072422)</p>    | <p>DTL,E2F8,PCNA,GADD45A,TFDP1,AURKA,CCNB1,CDK1,PLK3,PLK2,CDK2,E2F1,TNKS1BP1,CASP2,BRCA1,ZNF385A,GTSE1,CNOT9,CDKN1A,UBA52,PIDD1,CNOT6,PML,RINT1,TP53,ARID3A,PRKDC,CARM1,PCBP4,TRIAP1,CDC25C,PLK1,CDC14B,ABRAXAS1,BAX,CNOT7,CHEK1,CNOT10,FZR1,CNOT8,PRMT1</p>                                                          |

chromosome segregation  
(GO:0007059)

FEN1,CDC6,CENPK,SKA2,CENPI,ZWILCH,SKA1,TRIP13,CENPU,DSN1,SPC25,DYNC1I1,NCAPG,NCAPH,ESCO2  
,DUSP1,  
CENPO,RACGAP1,CSNK2A2,CCNB1,DSCC1,FAM83D,CHMP1B,ERCC6L,NCAPD3,CENPW,KIF4A,CENPN,CENP  
M,NDC80,CDC23,MAD2L1,CIAO2B,MCMBP,BRCA1,SPAG5,NUF2,CCNE2,FANCD2,SMC1A,CDCA5,NDC1,KIF2  
3,TOP1MT,ARL8A,GEN1,PPP1CC,ZNF207,MUS81,SLF1,BRIP1,KNTC1,SGO1,SKA3,KIF2C,ERCC2,RB1,NUP85,M  
KI67,UBE2C,SPDL1,TACC3,ZWINT,  
NUP107,BUB1B,KNL1,BUB3,TTL,CDCA8,CENPQ,HJURP,NSL1,KPNB1,DLGAP5,NUP43,CENPL,CENPP,CHTF8,  
RIOK3,  
AKAP8L,RAD51C,GEM,OIP5,SMC2,SMC4,CTNNB1,AURKC,CEP57L1,RAN,KIF11,RCC1,RMI2,SFPQ,CENPH,NU  
MA1,RAD18,  
MAPRE1,H2AFY,BUB1,KNSTRN,CHMP2A,P3H4,ACTR2,ANAPC5,SPC24,CENPE,KIF22,HECW2,PLK1,CDC14B,  
NCAPD2,TOP1,XPO1,VPS4A,PHF23,LEMD2,KIFC1,TTK,NEK2,NAA60,NUP160,RPS3,CTCF,MIS12,PTTG1,ARL8  
B,DYNC1I2,PPP1R7, KIF18B,DYNLL1

---

DEGs: differentially expressive genes.
